# Supplementary material for: Host-specific phenotypic variation of a parasite co-introduced with invasive Burmese pythons
Source: PubMed Central journal article supplement (PMC6314578; doi:10.1371/journal.pone.0209252), 2019-01-02
Supplement: pone.0209252.s001.pdf [file pone.0209252.s001.pdf]

Supporting Information\_TPS file data

LM=10

509.00000 288.00000  
406.00000 292.00000  
350.00000 408.00000  
277.00000 411.00000  
256.00000 512.00000  
198.00000 518.00000  
365.00000 622.00000  
291.00000 635.00000  
556.00000 723.00000  
452.00000 749.00000

IMAGE=28744\_A\_NerCla\_female\_2X\_scale.tif

ID=28744\_A\_NerCla

SCALE=0.004878

LM=10

518.00000 320.00000  
412.00000 340.00000  
396.00000 414.00000  
307.00000 416.00000  
302.00000 524.00000  
262.00000 525.00000  
433.00000 600.00000  
352.00000 607.00000  
600.00000 633.00000  
502.00000 664.00000

IMAGE=28744\_B\_NerCla\_female\_2X\_scale.tif

ID=28744\_B\_NerCla

SCALE=0.004878

LM=10

428.00000 261.00000  
320.00000 290.00000  
293.00000 395.00000  
213.00000 422.00000  
231.00000 533.00000  
177.00000 553.00000  
357.00000 601.00000  
282.00000 646.00000  
538.00000 664.00000  
435.00000 706.00000

IMAGE=28744\_C\_NerCla\_female\_2X\_scale.tif

ID=28744\_C\_NerCla

SCALE=0.004878

LM=10

458.00000 283.00000  
352.00000 316.00000  
296.00000 425.00000  
214.00000 451.00000  
206.00000 585.00000

Supporting Information\_TPS file data

145.00000 598.00000  
355.00000 673.00000  
272.00000 684.00000  
562.00000 709.00000  
455.00000 733.00000  
IMAGE=28744\_D\_NerCla\_female\_2X\_scale.tif  
ID=28744\_D\_NerCla  
SCALE=0.004878  
LM=10  
459.00000 217.00000  
350.00000 202.00000  
315.00000 295.00000  
231.00000 299.00000  
225.00000 406.00000  
144.00000 395.00000  
266.00000 546.00000  
191.00000 499.00000  
398.00000 644.00000  
288.00000 615.00000  
IMAGE=28751\_A\_AgkPis\_female\_2X\_scale.tif  
ID=28751\_A\_AgkPis  
SCALE=0.004878  
LM=10  
738.00000 311.00000  
632.00000 318.00000  
550.00000 331.00000  
465.00000 320.00000  
382.00000 423.00000  
317.00000 388.00000  
445.00000 601.00000  
373.00000 556.00000  
590.00000 729.00000  
491.00000 687.00000  
IMAGE=28751\_B\_AgkPis\_female\_2X\_scale.tif  
ID=28751\_B\_AgkPis  
SCALE=0.004878  
LM=10  
468.00000 240.00000  
368.00000 255.00000  
352.00000 294.00000  
284.00000 344.00000  
303.00000 436.00000  
219.00000 436.00000  
378.00000 526.00000  
298.00000 486.00000  
473.00000 620.00000  
403.00000 554.00000  
IMAGE=28751\_D\_AgkPis\_female\_2X\_scale.tif

Supporting Information\_TPS file data

ID=28751\_D\_AgkPis

SCALE=0.004877

LM=10

439.00000 211.00000

340.00000 183.00000

251.00000 289.00000

168.00000 281.00000

111.00000 427.00000

51.00000 443.00000

215.00000 591.00000

139.00000 594.00000

369.00000 732.00000

274.00000 713.00000

IMAGE=28754\_A\_AgkPis\_female\_2X\_scale.tif

ID=28754\_A\_AgkPis

SCALE=0.004878

LM=10

606.00000 310.00000

506.00000 296.00000

491.00000 420.00000

420.00000 453.00000

465.00000 544.00000

400.00000 559.00000

549.00000 623.00000

480.00000 659.00000

725.00000 653.00000

645.00000 718.00000

IMAGE=28759\_A\_ColCon\_female\_2X\_scale.tif

ID=28759\_A\_ColCon

SCALE=0.004878

LM=10

621.00000 305.00000

527.00000 314.00000

518.00000 389.00000

439.00000 411.00000

475.00000 505.00000

387.00000 517.00000

572.00000 576.00000

494.00000 587.00000

723.00000 593.00000

629.00000 636.00000

IMAGE=28759\_B\_ColCon\_female\_2X\_scale.tif

ID=28759\_B\_ColCon

SCALE=0.004878

LM=10

610.00000 368.00000

533.00000 324.00000

450.00000 406.00000

Supporting Information\_TPS file data

379.00000 414.00000  
344.00000 504.00000  
273.00000 502.00000  
414.00000 628.00000  
346.00000 601.00000  
558.00000 749.00000  
480.00000 694.00000  
IMAGE=28759\_C\_ColCon\_female\_2X\_scale.tif  
ID=28759\_C\_ColCon  
SCALE=0.004878  
LM=10  
527.00000 417.00000  
425.00000 434.00000  
434.00000 540.00000  
358.00000 515.00000  
367.00000 629.00000  
292.00000 635.00000  
460.00000 687.00000  
392.00000 732.00000  
573.00000 760.00000  
476.00000 812.00000  
IMAGE=28761\_A\_NerCla\_female\_2X\_scale.tif  
ID=28761\_A\_NerCla  
SCALE=0.004878  
LM=10  
391.00000 413.00000  
324.00000 420.00000  
275.00000 504.00000  
220.00000 526.00000  
222.00000 616.00000  
174.00000 634.00000  
316.00000 683.00000  
256.00000 696.00000  
455.00000 720.00000  
387.00000 752.00000  
IMAGE=28761\_B\_NerCla\_female\_2X\_scale.tif  
ID=28761\_B\_NerCla  
SCALE=0.004878  
LM=10  
530.00000 173.00000  
414.00000 174.00000  
292.00000 286.00000  
204.00000 318.00000  
212.00000 490.00000  
139.00000 507.00000  
294.00000 643.00000  
202.00000 645.00000  
525.00000 754.00000

Supporting Information\_TPS file data

412.00000 789.00000  
IMAGE=28761\_C\_NerCla\_female\_2X\_scale.tif  
ID=28761\_C\_NerCla  
SCALE=0.004878  
LM=10

654.00000 302.00000  
546.00000 306.00000  
471.00000 382.00000  
392.00000 353.00000  
344.00000 465.00000  
282.00000 454.00000  
422.00000 556.00000  
340.00000 575.00000  
607.00000 676.00000  
500.00000 682.00000

IMAGE=28763\_A\_ColCon\_female\_2X\_scale.tif  
ID=28763\_A\_ColCon  
SCALE=0.004878  
LM=10

643.00000 400.00000  
547.00000 423.00000  
525.00000 510.00000  
464.00000 546.00000  
499.00000 611.00000  
446.00000 655.00000  
611.00000 678.00000  
543.00000 724.00000  
789.00000 721.00000  
688.00000 750.00000

IMAGE=28763\_B\_ColCon\_female\_2X\_scale.tif  
ID=28763\_B\_ColCon  
SCALE=0.004878  
LM=10

507.00000 392.00000  
415.00000 366.00000  
358.00000 444.00000  
286.00000 475.00000  
301.00000 536.00000  
235.00000 567.00000  
383.00000 619.00000  
304.00000 640.00000  
535.00000 674.00000  
440.00000 713.00000

IMAGE=28763\_C\_ColCon\_female\_2X\_scale.tif  
ID=28763\_C\_ColCon  
SCALE=0.004878  
LM=10

503.00000 318.00000

Supporting Information\_TPS file data

395.00000 348.00000  
347.00000 450.00000  
265.00000 490.00000  
255.00000 620.00000  
196.00000 633.00000  
381.00000 703.00000  
293.00000 726.00000  
559.00000 756.00000  
453.00000 783.00000  
IMAGE=29392\_A\_PytMol\_female\_2X\_scale.tif  
ID=29392\_A\_PytMol  
SCALE=0.004878  
LM=10  
575.00000 394.00000  
470.00000 372.00000  
416.00000 442.00000  
331.00000 441.00000  
280.00000 513.00000  
227.00000 495.00000  
354.00000 669.00000  
281.00000 634.00000  
498.00000 763.00000  
388.00000 775.00000  
IMAGE=29392\_B\_PytMol\_female\_2X\_scale.tif  
ID=29392\_B\_PytMol  
SCALE=0.004878  
LM=10  
609.00000 372.00000  
512.00000 361.00000  
482.00000 418.00000  
397.00000 418.00000  
346.00000 475.00000  
299.00000 445.00000  
414.00000 587.00000  
339.00000 555.00000  
544.00000 635.00000  
445.00000 655.00000  
IMAGE=29394\_A\_PytMol\_female\_2X\_scale.tif  
ID=29394\_A\_PytMol  
SCALE=0.004878  
LM=10  
652.00000 409.00000  
556.00000 417.00000  
482.00000 488.00000  
402.00000 497.00000  
382.00000 599.00000  
322.00000 597.00000  
485.00000 724.00000

Supporting Information\_TPS file data

405.00000 703.00000  
674.00000 812.00000  
578.00000 821.00000  
IMAGE=29394\_B\_PytMol\_female\_2X\_scale.tif  
ID=29394\_B\_PytMol  
SCALE=0.004878  
LM=10  
422.00000 289.00000  
366.00000 222.00000  
268.00000 348.00000  
191.00000 330.00000  
151.00000 431.00000  
86.00000 429.00000  
268.00000 528.00000  
191.00000 536.00000  
419.00000 570.00000  
348.00000 642.00000  
IMAGE=29402\_A\_PytMol\_female\_2X\_scale.tif  
ID=29402\_A\_PytMol  
SCALE=0.004878  
LM=10  
719.00000 355.00000  
623.00000 307.00000  
496.00000 385.00000  
423.00000 350.00000  
341.00000 430.00000  
288.00000 401.00000  
411.00000 589.00000  
337.00000 554.00000  
543.00000 765.00000  
445.00000 732.00000  
IMAGE=29413\_A\_PytMol\_female\_2X\_scale.tif  
ID=29413\_A\_PytMol  
SCALE=0.004878  
LM=10  
492.00000 384.00000  
403.00000 322.00000  
285.00000 399.00000  
202.00000 403.00000  
139.00000 494.00000  
82.00000 478.00000  
224.00000 630.00000  
140.00000 616.00000  
374.00000 785.00000  
267.00000 777.00000  
IMAGE=29413\_B\_PytMol\_female\_2X\_scale.tif  
ID=29413\_B\_PytMol  
SCALE=0.004878

Supporting Information\_TPS file data

LM=10

650.00000 212.00000

539.00000 244.00000

501.00000 419.00000

429.00000 463.00000

413.00000 603.00000

349.00000 622.00000

582.00000 724.00000

501.00000 729.00000

822.00000 803.00000

709.00000 819.00000

IMAGE=29413\_C\_PytMol\_female\_2X\_scale.tif

ID=29413\_C\_PytMol

SCALE=0.004878

LM=10

707.00000 258.00000

591.00000 226.00000

480.00000 317.00000

387.00000 287.00000

285.00000 399.00000

212.00000 392.00000

352.00000 602.00000

262.00000 606.00000

536.00000 762.00000

420.00000 798.00000

IMAGE=40091\_A\_ThaSir\_female\_2X\_scale.tif

ID=40091\_A\_ThaSir

SCALE=0.004878

LM=10

546.00000 328.00000

449.00000 257.00000

348.00000 342.00000

275.00000 287.00000

201.00000 396.00000

138.00000 361.00000

272.00000 571.00000

179.00000 536.00000

392.00000 734.00000

276.00000 703.00000

IMAGE=40091\_B\_ThaSir\_female\_2X\_scale.tif

ID=40091\_B\_ThaSir

SCALE=0.004878

LM=10

508.00000 221.00000

396.00000 225.00000

358.00000 347.00000

281.00000 381.00000

272.00000 488.00000



Supporting Information\_TPS file data

205.00000 502.00000  
410.00000 603.00000  
322.00000 617.00000  
582.00000 685.00000  
481.00000 733.00000  
IMAGE=40103\_A\_ThaSir\_female\_2X\_scale.tif  
ID=40103\_A\_ThaSir  
SCALE=0.004878  
LM=10  
533.00000 343.00000  
444.00000 273.00000  
368.00000 368.00000  
284.00000 348.00000  
224.00000 453.00000  
154.00000 433.00000  
292.00000 599.00000  
208.00000 576.00000  
420.00000 712.00000  
312.00000 755.00000  
IMAGE=40103\_B\_ThaSir\_female\_2X\_scale.tif  
ID=40103\_B\_ThaSir  
SCALE=0.004878  
LM=10  
683.00000 340.00000  
583.00000 312.00000  
510.00000 368.00000  
422.00000 365.00000  
363.00000 455.00000  
294.00000 423.00000  
419.00000 607.00000  
332.00000 586.00000  
555.00000 747.00000  
452.00000 712.00000  
IMAGE=40104\_A\_ThaSir\_female\_2X\_scale.tif  
ID=40104\_A\_ThaSir  
SCALE=0.004878  
LM=10  
509.00000 255.00000  
409.00000 239.00000  
340.00000 361.00000  
263.00000 364.00000  
240.00000 491.00000  
157.00000 481.00000  
349.00000 610.00000  
262.00000 614.00000  
513.00000 656.00000  
406.00000 695.00000  
IMAGE=40871\_A\_NerCla\_female\_2X\_scale.tif

Supporting Information\_TPS file data

ID=40871\_A\_NerCla

SCALE=0.004878

LM=10

625.00000 296.00000

512.00000 338.00000

419.00000 425.00000

329.00000 448.00000

260.00000 624.00000

190.00000 634.00000

482.00000 685.00000

394.00000 714.00000

721.00000 708.00000

614.00000 722.00000

IMAGE=40871\_B\_NerCla\_female\_2X\_scale.tif

ID=40871\_B\_NerCla

SCALE=0.004878

LM=10

546.00000 227.00000

432.00000 229.00000

362.00000 312.00000

277.00000 304.00000

230.00000 427.00000

159.00000 421.00000

343.00000 579.00000

255.00000 570.00000

526.00000 685.00000

414.00000 703.00000

IMAGE=40871\_C\_NerCla\_female\_2X\_scale.tif

ID=40871\_C\_NerCla

SCALE=0.004878

LM=10

490.00000 101.00000

374.00000 97.00000

315.00000 201.00000

224.00000 208.00000

217.00000 319.00000

148.00000 329.00000

330.00000 441.00000

249.00000 421.00000

517.00000 506.00000

413.00000 511.00000

IMAGE=40871\_D\_NerCla\_female\_2X\_scale.tif

ID=40871\_D\_NerCla

SCALE=0.004878

LM=10

475.00000 385.00000

369.00000 369.00000

293.00000 486.00000

Supporting Information\_TPS file data

223.00000 469.00000  
198.00000 593.00000  
135.00000 589.00000  
304.00000 699.00000  
222.00000 709.00000  
492.00000 760.00000  
401.00000 808.00000  
IMAGE=40871\_E\_NerCla\_female\_2X\_scale.tif  
ID=40871\_E\_NerCla  
SCALE=0.004878  
LM=10  
591.00000 321.00000  
484.00000 294.00000  
427.00000 383.00000  
346.00000 410.00000  
314.00000 537.00000  
239.00000 526.00000  
420.00000 680.00000  
334.00000 655.00000  
563.00000 800.00000  
460.00000 781.00000  
IMAGE=40871\_J\_NerCla\_female\_2X\_scale.tif  
ID=40871\_J\_NerCla  
SCALE=0.004878  
LM=10  
742.00000 273.00000  
631.00000 275.00000  
562.00000 375.00000  
476.00000 355.00000  
434.00000 503.00000  
363.00000 503.00000  
553.00000 640.00000  
459.00000 642.00000  
749.00000 732.00000  
629.00000 725.00000  
IMAGE=40871\_K\_NerCla\_female\_2X\_scale.tif  
ID=40871\_K\_NerCla  
SCALE=0.004878  
LM=10  
401.00000 300.00000  
340.00000 239.00000  
249.00000 363.00000  
167.00000 345.00000  
132.00000 452.00000  
65.00000 446.00000  
251.00000 545.00000  
173.00000 557.00000  
399.00000 584.00000

Supporting Information\_TPS file data

338.00000 664.00000  
IMAGE=29402\_A\_PytMol\_female2\_2X\_scale.tif  
ID=29402\_A\_PytMol  
SCALE=0.004878  
LM=10  
454.00000 268.00000  
424.00000 171.00000  
291.00000 314.00000  
221.00000 286.00000  
185.00000 395.00000  
125.00000 382.00000  
273.00000 478.00000  
223.00000 513.00000  
414.00000 559.00000  
359.00000 636.00000  
IMAGE=29402\_B\_PytMol\_female\_2X\_scale.tif  
ID=29402\_B\_PytMol  
SCALE=0.004878
